# Supplementary material
Source: PubMed Central journal article supplement (PMC4967352)

## Supplementary Online Content

Kim Y, Margonis GA, Prescott JD, et al. Nomograms to predict recurrence-free and overall survival after curative resection of adrenocortical carcinoma. *JAMA Surg*. Published online December 16, 2015. doi:10.1001/jamasurg.2015.4516.

**eTable.** Baseline Patient and Tumor Characteristics of the Patients Undergoing Surgical Resection for ACC

**eFigure.** Kaplan-Meier Curves Demonstrating Recurrence-Free and Overall Survival for Patients Following Resection for ACC

This supplementary material has been provided by the authors to give readers additional information about their work.

**eTable.** Baseline Patient and Tumor Characteristics of the Patients Undergoing Surgical Resection for ACC

| Characteristic                       | Total (n=148)        |
|--------------------------------------|----------------------|
| Age, yr, median (IQR)                | 53.0(44.0-62.0)      |
| Sex                                  |                      |
| Female                               | 97 (65.5)            |
| Male                                 | 51 (34.5)            |
| Race (n=143)                         |                      |
| White                                | 117 (81.8)           |
| Black                                | 9 (6.3)              |
| Others                               | 17 (11.9)            |
| Size, cm, median (IQR)               | 11.2 (8.0-15.0)      |
| Body Mass Index, Kg/m2, median (IQR) | 28.0(24.0-33.0)      |
| Incidentaloma                        | 75 (50.7)            |
| Nodal status                         |                      |
| Negative                             | 39 (26.3)            |
| Positive                             | 13 (8.8)             |
| Not harvested                        | 96 (64.9)            |
| T stage                              |                      |
| T1/T2                                | 76 (51.4)            |
| T3/T4                                | 72 (48.6)            |
| ASA*                                 |                      |
| I/II                                 | 48 (44.8)            |
| III/IV                               | 59 (55.2)            |
| Hormonal secretion                   |                      |
| Glucocorticoid                       | 28 (18.9)            |
| Mineralocorticoid                    | 8 (5.4)              |
| Virilizing/Feminizing                | 16 (10.8)            |
| Nonsecreting                         | 96 (64.9)            |
| Operation approach                   |                      |
| Open abdominal or posterior          | 95 (64.6)            |
| Minimally invasive Surgery           | 28 (19.1)            |
| Thoracoabdominal Surgery             | 24 (16.3)            |
| Margin                               |                      |
| R0                                   | 115 (77.7)           |
| R1                                   | 33 (22.3)            |
| Laterality**                         |                      |
| Left                                 | 75 (51.4)            |
| Right                                | 71 (48.6)            |
| Capsular invasion***                 |                      |
| No                                   | 46 (42.2)            |
| Yes                                  | 63 (57.8)            |
| Other organ resected                 | 65 (43.9)            |
| Transfusion                          | 36 (24.3)            |
| Complication                         | 40 (27.0)            |
| Grade of complications               |                      |
| Grade I and II                       | 28 (70.0)            |
| Grade III and IV                     | 12 (30.0)            |
| Neoadjuvant chemotherapy             | 2 (1.4)              |
| Adjuvant chemotherapy                | 15 (10.1)            |
| Adjuvant radiotherapy                | 15 (10.4)            |
| Postoperative Mitotane               | 46 (31.1)            |
| Estimated blood loss, ml             | 600.0 (200.0-1600.0) |

ASA, American Society of Anesthesiologist; \* n=107; \*\* n=146; \*\*\* n=109

**eFigure.** Kaplan-Meier Curves Demonstrating Recurrence-Free and Overall Survival for Patients Following Resection for ACC

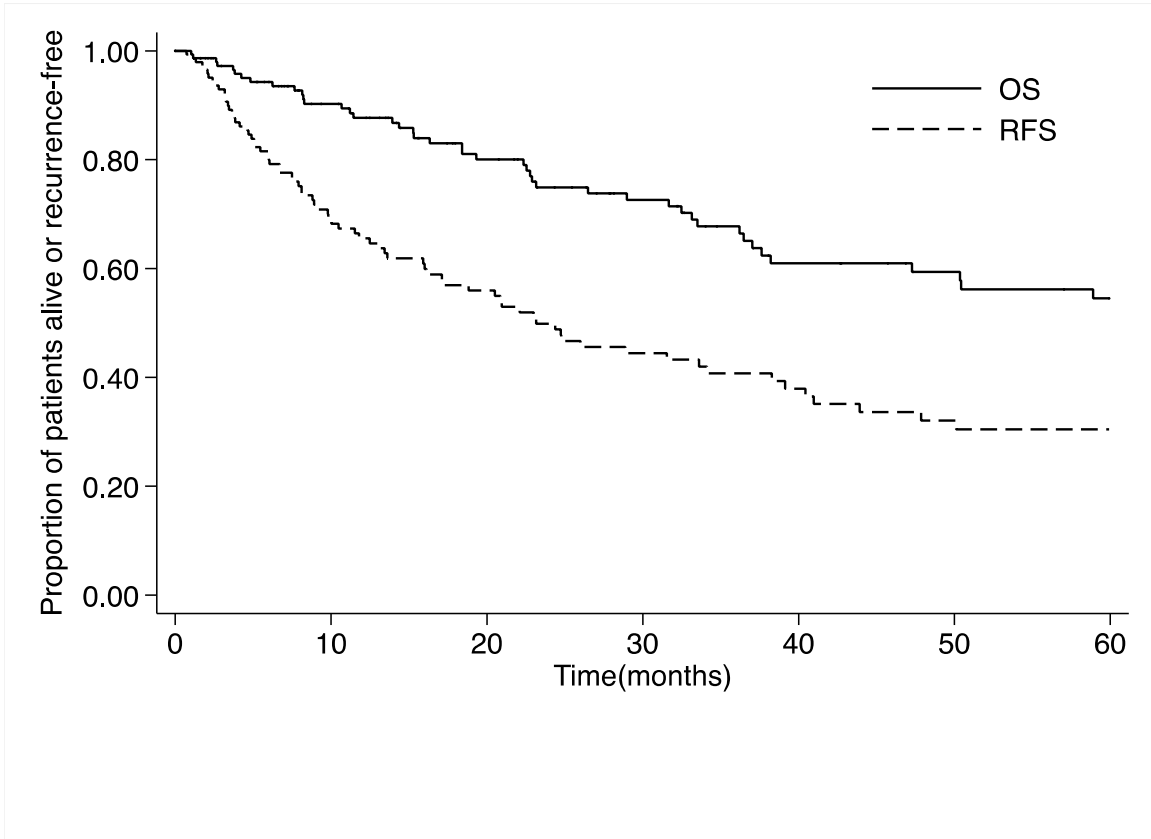

Supplement: NIHMS802586-supplement-Supplemental_Data.pdf [file NIHMS802586-supplement-Supplemental_Data.pdf]
